# Supplementary material for: Multiobjective optimization identifies cancer-selective combination therapies
Source: PubMed Central journal article supplement (PMC7793282; doi:10.1371/journal.pcbi.1008538), 2020-12-28
Supplement: pcbi.1008538.s005.pdf [file pcbi.1008538.s005.pdf]

| Treatment                       | Nonselective effect $\bar{E}_\delta$ | Therapeutic effect $E$ |
|---------------------------------|--------------------------------------|------------------------|
| imiquimod                       | 0.11                                 | 0.02                   |
| amifostine                      | 0.13                                 | 0.03                   |
| fulvestrant                     | 0.13                                 | 0.03                   |
| zoledronic acid                 | 0.15                                 | 0.05                   |
| mitotane                        | 0.15                                 | 0.05                   |
| sunitinib                       | 0.16                                 | 0.08                   |
| tretinoin                       | 0.20                                 | 0.25                   |
| vemurafenib                     | 0.24                                 | 1.60                   |
| methoxsalen + vemurafenib       | 0.39                                 | 1.74                   |
| anastrozole + vemurafenib       | 0.40                                 | 1.90                   |
| thalidomide + vemurafenib       | 0.42                                 | 1.93                   |
| tretinoin + vemurafenib         | 0.48                                 | 2.08                   |
| sirolimus + vemurafenib         | 0.62                                 | 2.44                   |
| quinacrine + vemurafenib        | 0.78                                 | 2.45                   |
| gefitinib + vemurafenib         | 0.82                                 | 2.99                   |
| arsenic trioxide + dactinomycin | 1.42                                 | 3.04                   |
| cisplatin + vemurafenib         | 1.42                                 | 3.08                   |
| arsenic trioxide + vemurafenib  | 1.48                                 | 3.43                   |
| cisplatin + everolimus          | 1.54                                 | 4.05                   |
| arsenic trioxide + quinacrine   | 1.86                                 | 4.15                   |
| dactinomycin + tamoxifen        | 2.23                                 | 4.21                   |
| everolimus + mithramycin        | 2.59                                 | 4.23                   |
| bortezomib + vemurafenib        | 2.69                                 | 4.41                   |
| mithramycin + sirolimus         | 2.75                                 | 4.98                   |
| mithramycin + vemurafenib       | 2.75                                 | 5.80                   |
| mithramycin + valrubicin        | 4.82                                 | 7.85                   |
