# Supplementary material for: Multiobjective optimization identifies cancer-selective combination therapies
Source: PubMed Central journal article supplement (PMC7793282; doi:10.1371/journal.pcbi.1008538), 2020-12-28
Supplement: pcbi.1008538.s006.pdf [file pcbi.1008538.s006.pdf]

| Treatment                                   | Nonselective effect $\bar{E}_\delta$ | Therapeutic effect $E$ |
|---------------------------------------------|--------------------------------------|------------------------|
| imiquimod                                   | 0.11                                 | 0.02                   |
| amifostine                                  | 0.13                                 | 0.03                   |
| fulvestrant                                 | 0.13                                 | 0.03                   |
| zoledronic acid                             | 0.15                                 | 0.05                   |
| mitotane                                    | 0.15                                 | 0.05                   |
| sunitinib                                   | 0.16                                 | 0.08                   |
| tretinoin                                   | 0.20                                 | 0.25                   |
| vemurafenib                                 | 0.24                                 | 1.60                   |
| methoxsalen + vemurafenib                   | 0.39                                 | 1.74                   |
| anastrozole + vemurafenib                   | 0.40                                 | 1.90                   |
| thalidomide + vemurafenib                   | 0.42                                 | 1.93                   |
| tretinoin + vemurafenib                     | 0.48                                 | 2.08                   |
| methoxsalen + thalidomide + vemurafenib     | 0.58                                 | 2.10                   |
| anastrozole + letrozole + vemurafenib       | 0.59                                 | 2.13                   |
| anastrozole + thalidomide + vemurafenib     | 0.59                                 | 2.23                   |
| fulvestrant + thalidomide + vemurafenib     | 0.61                                 | 2.24                   |
| sirolimus + vemurafenib                     | 0.62                                 | 2.44                   |
| anastrozole + everolimus + vemurafenib      | 0.75                                 | 2.50                   |
| cyclophosphamide + sirolimus + vemurafenib  | 0.77                                 | 2.50                   |
| methoxsalen + sirolimus + vemurafenib       | 0.77                                 | 2.56                   |
| anastrozole + sirolimus + vemurafenib       | 0.80                                 | 2.76                   |
| gefitinib + vemurafenib                     | 0.82                                 | 2.99                   |
| celecoxib + sirolimus + vemurafenib         | 0.97                                 | 3.02                   |
| gefitinib + imiquimod + vemurafenib         | 0.98                                 | 3.13                   |
| gefitinib + methoxsalen + vemurafenib       | 1.00                                 | 3.39                   |
| anastrozole + gefitinib + vemurafenib       | 1.03                                 | 3.72                   |
| gefitinib + tretinoin + vemurafenib         | 1.11                                 | 3.83                   |
| gefitinib + vemurafenib + vismodegib        | 1.21                                 | 3.96                   |
| gefitinib + sirolimus + vemurafenib         | 1.24                                 | 4.42                   |
| gefitinib + quinacrine + vemurafenib        | 1.68                                 | 4.75                   |
| cisplatin + everolimus + vemurafenib        | 1.86                                 | 5.46                   |
| cisplatin + sirolimus + vemurafenib         | 1.93                                 | 5.55                   |
| cisplatin + everolimus + gefitinib          | 2.04                                 | 5.84                   |
| cisplatin + everolimus + sirolimus          | 2.08                                 | 5.96                   |
| cisplatin + doxorubicin + everolimus        | 2.12                                 | 6.09                   |
| arsenic trioxide + quinacrine + vemurafenib | 2.15                                 | 6.25                   |
| dactinomycin + tamoxifen + vemurafenib      | 3.02                                 | 6.62                   |
| arsenic trioxide + dactinomycin + tamoxifen | 3.10                                 | 7.10                   |
| clofarabine + mithramycin + vemurafenib     | 3.46                                 | 7.11                   |
| mithramycin + sirolimus + vemurafenib       | 3.50                                 | 8.08                   |
| gefitinib + mithramycin + vemurafenib       | 4.18                                 | 8.52                   |
| gefitinib + mithramycin + vismodegib        | 4.41                                 | 8.67                   |
| mithramycin + pentostatin + valrubicin      | 4.94                                 | 10.13                  |
| mithramycin + pralatrexate + valrubicin     | 5.60                                 | 10.32                  |
| mithramycin + valrubicin + vemurafenib      | 5.62                                 | 10.71                  |
| mithramycin + sirolimus + valrubicin        | 5.64                                 | 10.86                  |
| doxorubicin + mithramycin + valrubicin      | 5.77                                 | 11.48                  |
